# Supplementary material
Source: HighWire-hosted journal article supplement (https://www.jneurosci.org/highwire/filestream/601606/field_highwire_adjunct_files/0/Supplemental_Figures.pdf)
Supplement: Supplemental_Figures.pdf [file Supplemental_Figures.pdf]

## Supplemental Fig. 1

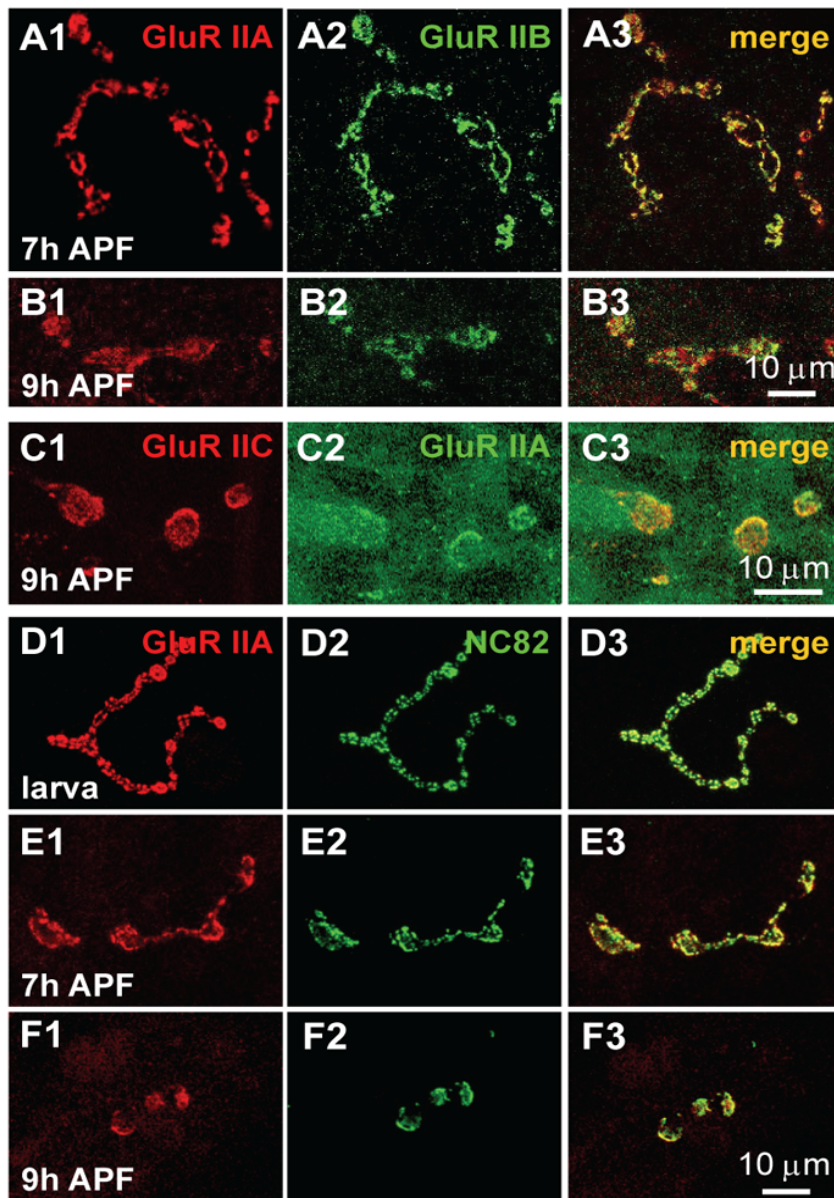

**Figure S1.** Different GluRs and active zone component Bruchpilot are eliminated simultaneously. *A-B*, Co-localization of subtype specific GluR IIA and GluR IIB at NMJ synapses of pupae at 7 h APF (*A*) and 9 h APF (*B*). *C*, Co-localization of subtype specific GluR IIA and the common subunit GluR IIC at NMJ synapses of 9 h APF pupae (*C*). *D-F*, Co-localization of GluR IIA and the active zone component Bruchpilot (recognized by antibody NC82) at NMJ synapses of larvae (*D*), pupae at 7 h APF (*E*) and 9 h APF (*F*). Scale bar, 10  $\mu\text{m}$ .

Supplemental Fig. S2

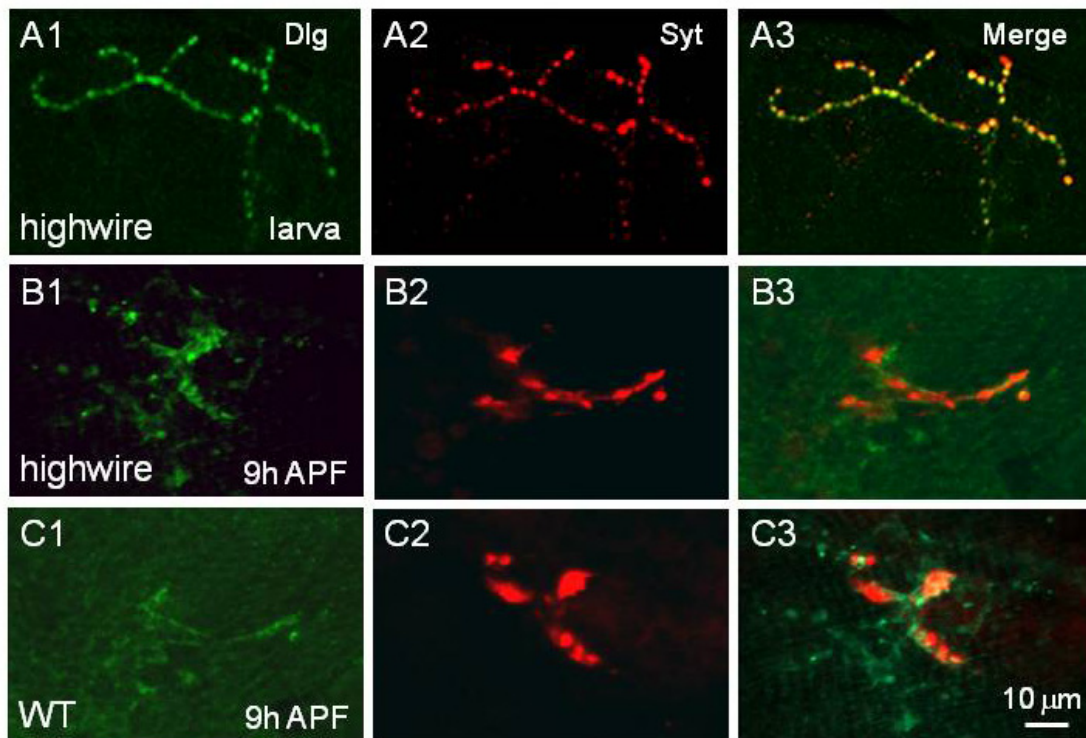

**Figure S2.** Mutations in the ring domain E3 ligase Highwire have no effect on synapse elimination. NMJ synapses were labeled by anti-Dlg (green) and anti-Syt (red). *highwire* mutant larvae show exuberantly grown NMJ synapses (**A**). NMJ synapses are eliminated normally in *highwire* mutants (**B**) as wild type (**C**) at 9 h APF. Scale bar, 10 μm.

## Supplemental Fig. S3

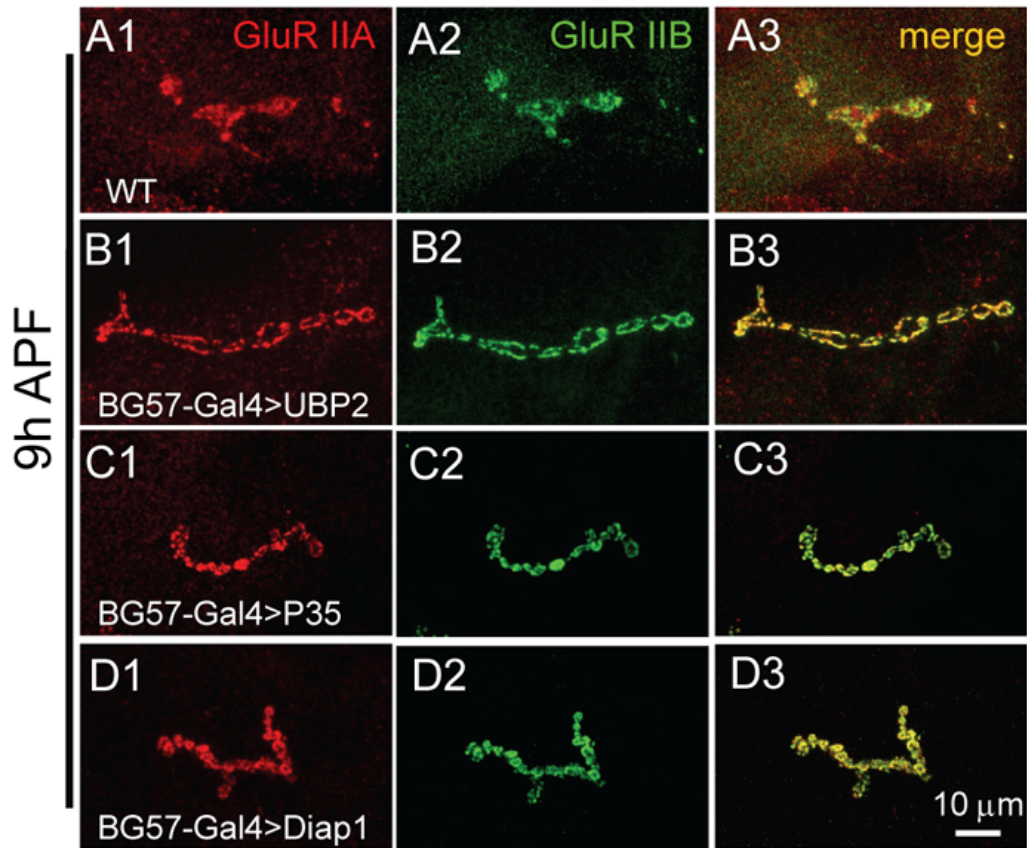

**Figure S3.** Blockade of ubiquitination pathway or apoptosis in postsynaptic muscles delays disassembly of GluRs. **A**, Decreased intensity of immuno-staining against GluR IIA and GluR IIB at synapses in 9 h APF pupae of wild type. **B-D**, Largely normal pattern of immuno-staining against GluR IIA and GluR IIB at synapses in 9 h APF pupae expressing UB2 (**B**), P35 (**C**), and Diap1 (**D**) in muscles by *BG57-Gal4*. Scale bar, 10  $\mu\text{m}$ .
